# Supplementary material for: Phylogenetic Detection of Recombination with a Bayesian Prior on the Distance between Trees
Source: PubMed Central journal article supplement (PMC2440540; doi:10.1371/journal.pone.0002651), 2008-07-09
Supplement: pone.0002651.s004.pdf [file pone.0002651.s004.pdf]

**Table S1**

Description of the 11 HIV-1 sequences used in the recombination detection analysis. The “code” field refers to the coding used when plotting the topologies.

| <b>Code</b> | <b>Sequence name</b> | <b>Accession number</b> | <b>Year of sampling</b> | <b>Subtype</b> | <b>Country</b> |
|-------------|----------------------|-------------------------|-------------------------|----------------|----------------|
| 1           | CH12                 | AY536235                | 2001                    | CRF_12-like    | Chile          |
| 2           | 12_BF.AR.99.ARMA159  | AF385936                | 1999                    | CRF_12         | Argentina      |
| 3           | 12_BF.UY.99.URTR35   | AF385935                | 1999                    | CRF_12         | Uruguay        |
| 4           | 12_BF.AR.97.A32879   | AF408629                | 1997                    | CRF_12-like    | Argentina      |
| 5           | BF.AR.99.ARMA029     | AY037283                | 1999                    | CRF_12-like    | Argentina      |
| 6           | BF.AR.99.ARMA097     | AY037280                | 1999                    | CRF_12-like    | Argentina      |
| 7           | BF.AR.99.A027        | AF332867                | 1999                    | CRF_12-like    | Argentina      |
| 8           | BF.AR.99.A047        | AF408627                | 1999                    | CRF_12-like    | Argentina      |
| F           | F1.BR.89.BZ126       | AY173957                | 1989                    | F1             | Brasil         |
| B           | B.BR.89.BZ167        | AY173956                | 1989                    | B              | Brasil         |
| C           | C.92.BR025           | U52953                  | 1992                    | C              | Brasil         |
